# Supplementary material for: Risk of cardiac and non-cardiac adverse events in community-dwelling older patients with atrial fibrillation: a prospective cohort study in the Netherlands
Source: PubMed Central journal article supplement — BMJ Open. 2018 Aug 23;8(8):e021681. doi: 10.1136/bmjopen-2018-021681 (PMC6112390; doi:10.1136/bmjopen-2018-021681), 2018-08-23
Supplement: bmjopen-2018-021681supp001.pdf [file bmjopen-2018-021681supp001.pdf]

### Supplement I. Most frequently prescribed drugs, per pharmacological subgroup

| ATC Group                                                    | n    | %    |
|--------------------------------------------------------------|------|------|
| Beta blocking agents                                         | 1397 | 67,6 |
| Agents acting on the renin-angiotensin system                | 1121 | 54,2 |
| Diuretics                                                    | 1007 | 48,7 |
| Drugs for peptic ulcer and gastro-oesophageal reflux disease | 896  | 43,3 |
| Lipid modifying agents, plain                                | 885  | 42,8 |
| Antibacterials for systemic use                              | 775  | 37,5 |
| Calcium channel blockers                                     | 511  | 24,7 |
| Anxiolytics, hypnotics and sedatives                         | 469  | 22,7 |
| Drugs for obstructive airway diseases                        | 454  | 22   |
| Corticosteroids, dermatological preparations                 | 433  | 20,9 |
| Drugs for constipation                                       | 431  | 20,8 |
| Blood glucose lowering drugs, excl. insulins                 | 372  | 18   |
| Antiarrhythmics, class I and III                             | 355  | 17,2 |
| Platelet aggregation inhibitors, excl. heparin               | 323  | 15,6 |
| Opioids                                                      | 309  | 14,9 |
| Corticosteroids for systemic use, plain                      | 304  | 14,7 |
| Other analgesics and antipyretics                            | 259  | 12,5 |
| Calcium supplements                                          | 252  | 12,2 |
| Vitamins                                                     | 225  | 10,9 |
| Antiinflammatory and antirheumatic products, non-steroids    | 203  | 9,8  |
| Decongestants and other nasal preparations for topical use   | 203  | 9,8  |
| Antifungals for dermatological use                           | 190  | 9,2  |
| Antidepressants                                              | 183  | 8,8  |
| Drugs used in benign prostatic hypertrophy                   | 175  | 8,5  |
| Drugs affecting bone structure and mineralization            | 150  | 7,3  |
| Antihistamines for systemic use                              | 134  | 6,5  |
| Insulins and analogues                                       | 130  | 6,3  |
| Antacids                                                     | 119  | 5,8  |
| Iron preparations                                            | 95   | 4,6  |

|                            |    |     |
|----------------------------|----|-----|
| Vitamin B12 and folic acid | 85 | 4,1 |
| Heparin                    | 72 | 3,5 |
| Antipsychotics             | 56 | 2,7 |
